# Supplementary material for: Green Efficient One-Pot Synthesis and Separation of Nitrones in Water Assisted by a Self-Assembled Nanoreactor
Source: MDPI journal article supplement (doi:10.3390/ijms23010236), 2021-12-26
Supplement: s1 [file s1]

# Green Efficient One-Pot Synthesis and Separation of Nitrones in Water Assisted by a Self-Assembled Nanoreactor

Vincenzo Patamia <sup>1</sup>, Giuseppe Floresta <sup>2</sup>, Venerando Pistarà <sup>2</sup> and Antonio Rescifina <sup>2,\*</sup>

<sup>1</sup> Dipartimento di Scienze Chimiche, Università di Catania, Viale A. Doria 6, 95125 Catania, Italy; [vincenzo.patamia@unict.it](mailto:vincenzo.patamia@unict.it) (V.P.)

<sup>2</sup> Dipartimento di Scienze del Farmaco e della Salute, Università di Catania, Viale A. Doria 6, 95125 Catania, Italy; [giuseppe.floresta@kcl.ac.uk](mailto:giuseppe.floresta@kcl.ac.uk) (G.F.); [vpistara@unict.it](mailto:vpistara@unict.it) (V.P.); [arescifina@unict.it](mailto:arescifina@unict.it) (A.R.)

\* Correspondence: [arescifina@unict.it](mailto:arescifina@unict.it) (A.R.)

## Table of contents

|                                                                             |     |
|-----------------------------------------------------------------------------|-----|
| Scheme S1. Ligand synthesis procedure.....                                  | S3  |
| Scheme S2. Capsule assembly with the tetraethylammonium salt.....           | S3  |
| Figure S1. DOSY experiment of tetraethylammoniumsalt@capsule <b>1</b> ..... | S4  |
| Figure S2. <sup>1</sup> H NMR spectrum of <b>4a</b> .....                   | S4  |
| Figure S3. <sup>13</sup> C NMR spectrum of <b>4a</b> .....                  | S5  |
| Figure S4. <sup>1</sup> H NMR spectrum of <b>4b</b> .....                   | S5  |
| Figure S5. <sup>13</sup> C NMR spectrum of <b>4b</b> .....                  | S6  |
| Figure S6. 1D NOESY of <b>4b</b> .....                                      | S6  |
| Figure S7. <sup>1</sup> H NMR spectrum of <b>4c</b> .....                   | S7  |
| Figure S8. <sup>13</sup> C NMR spectrum of <b>4c</b> .....                  | S7  |
| Figure S9. <sup>1</sup> H NMR spectrum of <b>4d</b> .....                   | S8  |
| Figure S10. <sup>13</sup> C NMR spectrum of <b>4d</b> .....                 | S8  |
| Figure S11. <sup>1</sup> H NMR spectrum of <b>4e</b> .....                  | S9  |
| Figure S12. <sup>13</sup> C NMR spectrum of <b>4e</b> .....                 | S9  |
| Figure S13. <sup>1</sup> H NMR spectrum of <b>4f</b> .....                  | S10 |
| Figure S14. <sup>13</sup> C NMR spectrum of <b>4f</b> .....                 | S10 |
| Figure S15. DOSY spectrum of <b>1</b> .....                                 | S11 |
| Figure S16. DOSY spectrum of <b>2a</b> .....                                | S11 |
| Figure S17. DOSY spectrum of <b>3</b> .....                                 | S12 |
| Figure S18. DOSY spectrum of <b>4a</b> .....                                | S12 |
| Figure S19. DOSY spectrum of <b>2a@1</b> .....                              | S13 |
| Figure S20. DOSY spectrum of <b>4a@1</b> .....                              | S13 |
| Figure S21. DOSY spectrum of <b>3@1</b> .....                               | S14 |

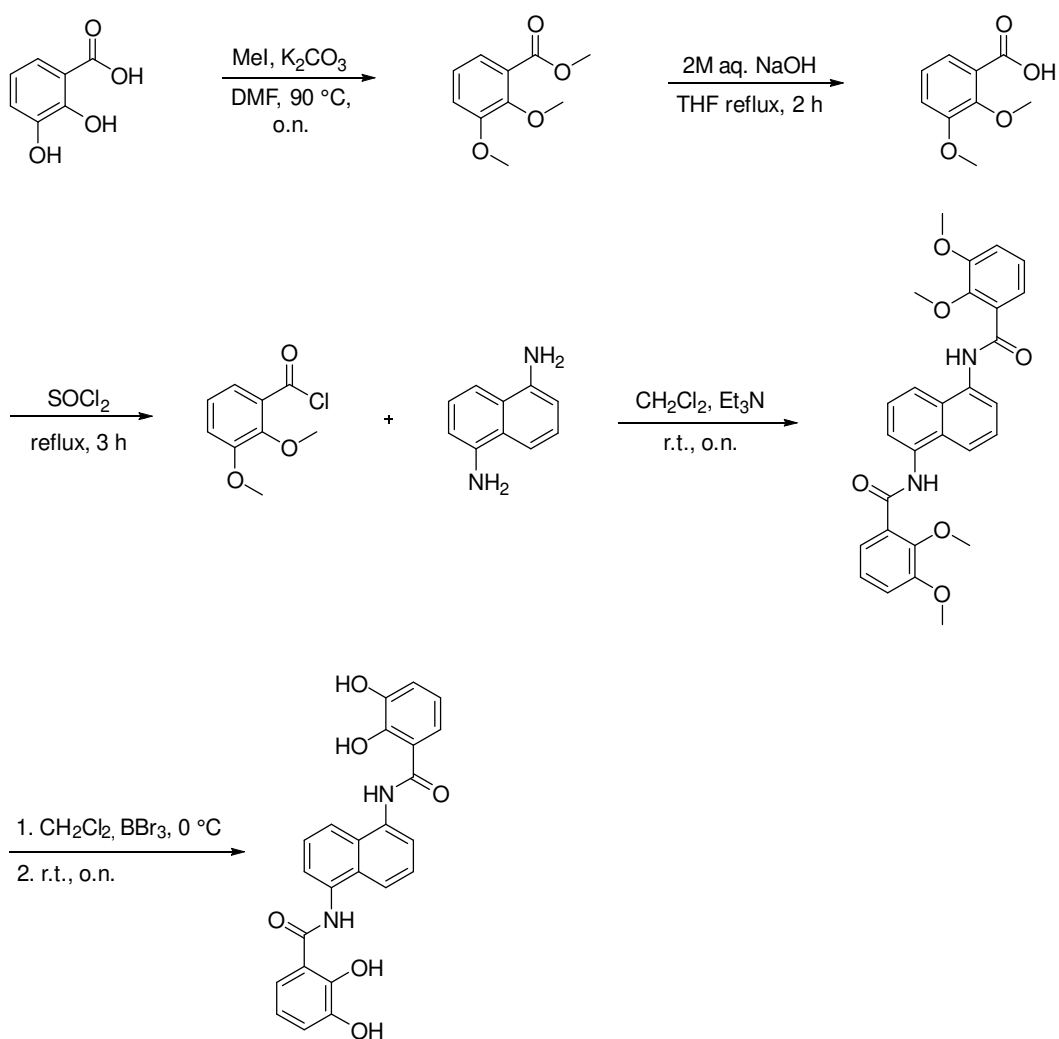

**Scheme S1.** Ligand synthesis procedure.

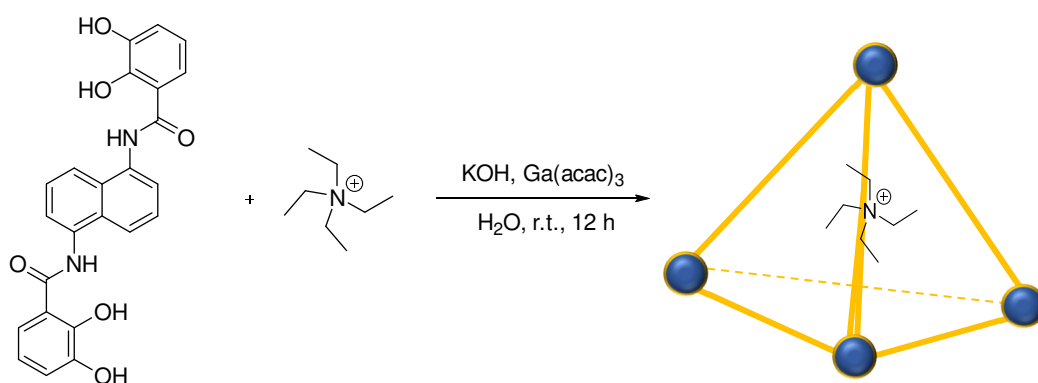

**Scheme S2.** Capsule assembly with the tetraethylammonium salt.

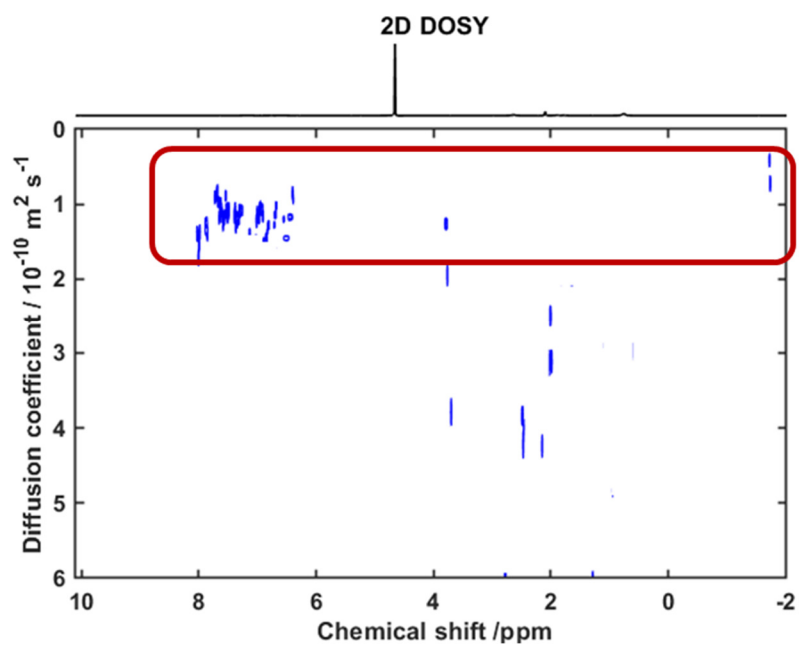

Figure S1. DOSY experiment of tetraethylammoniumsalt@capsule 1.

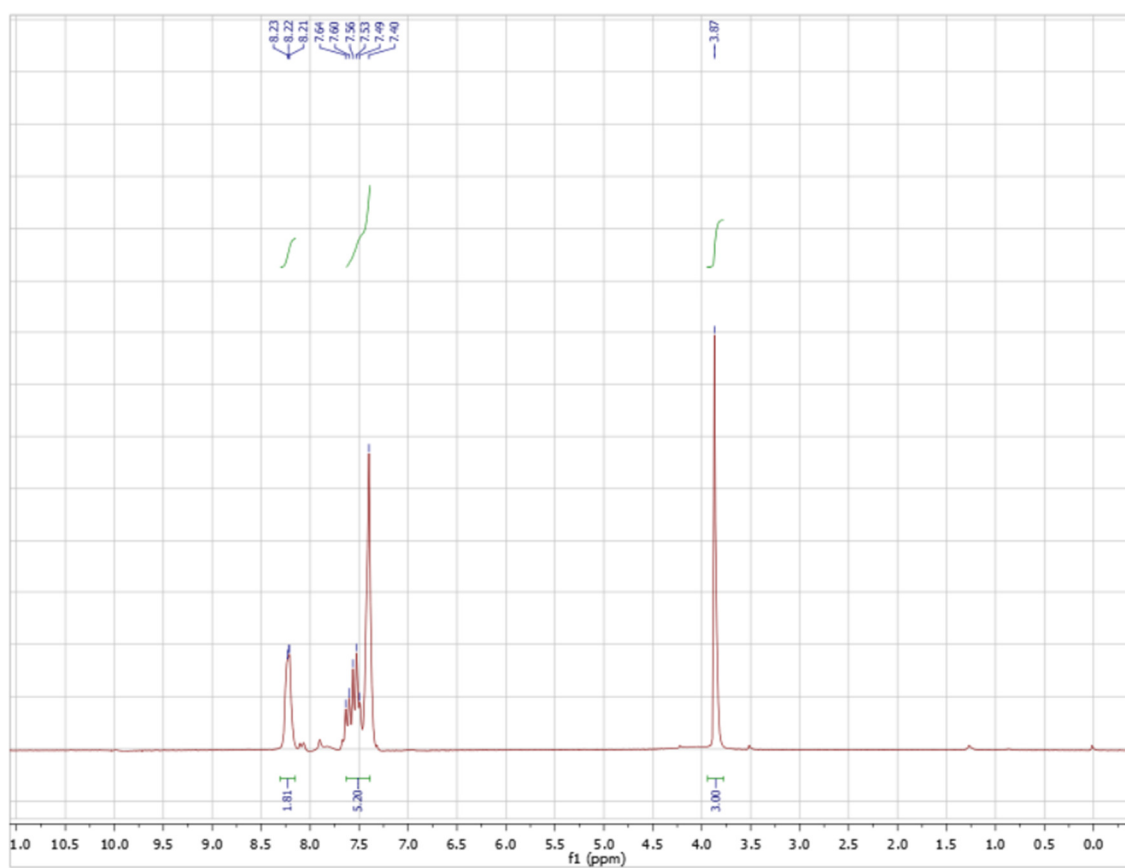

Figure S2.  $^1\text{H}$  NMR 4a.

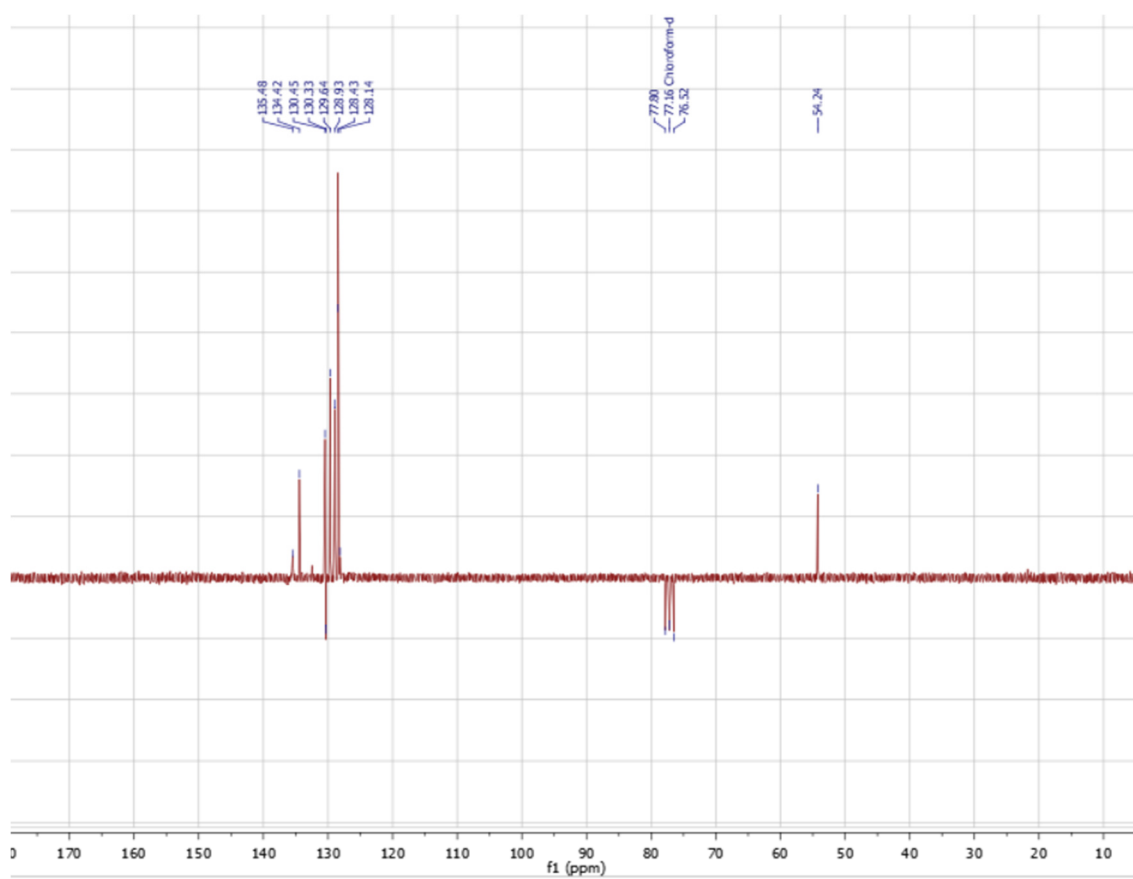

Figure S3. <sup>13</sup>C NMR 4a.

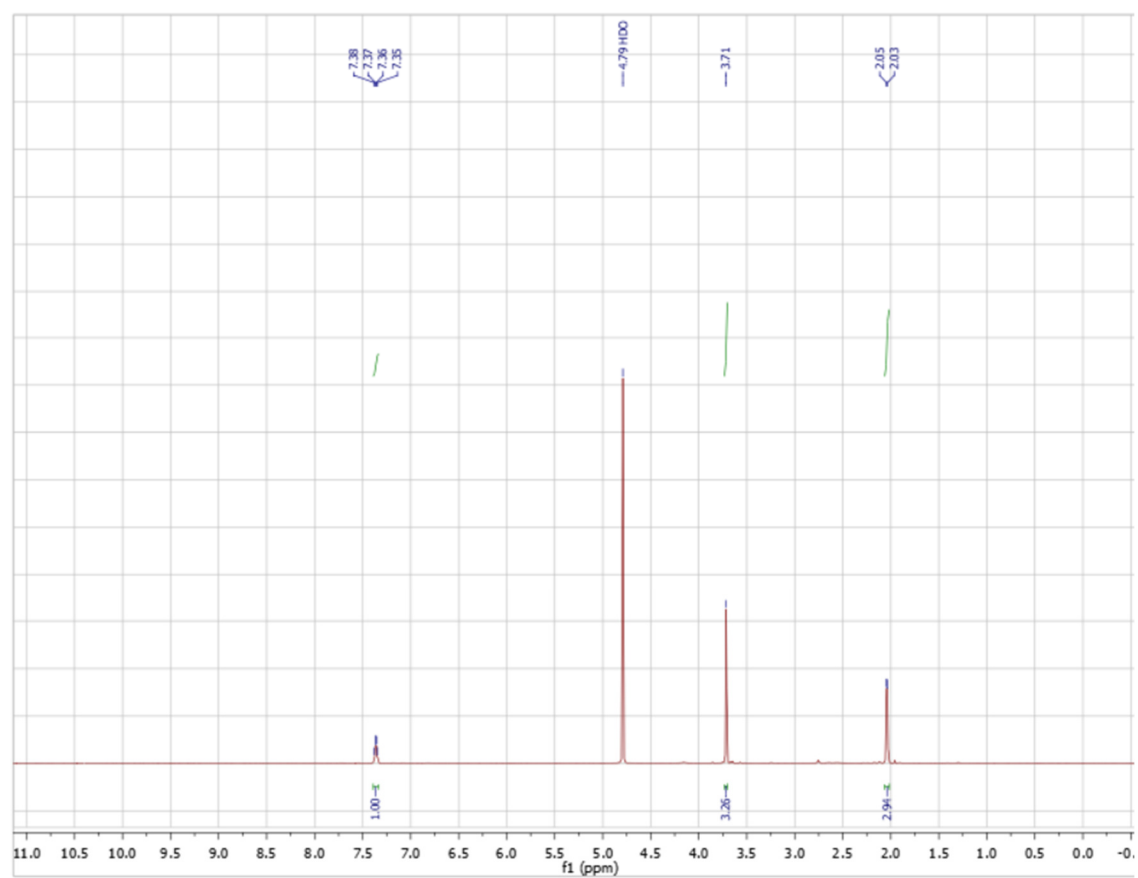

Figure S4. <sup>1</sup>H NMR 4b.

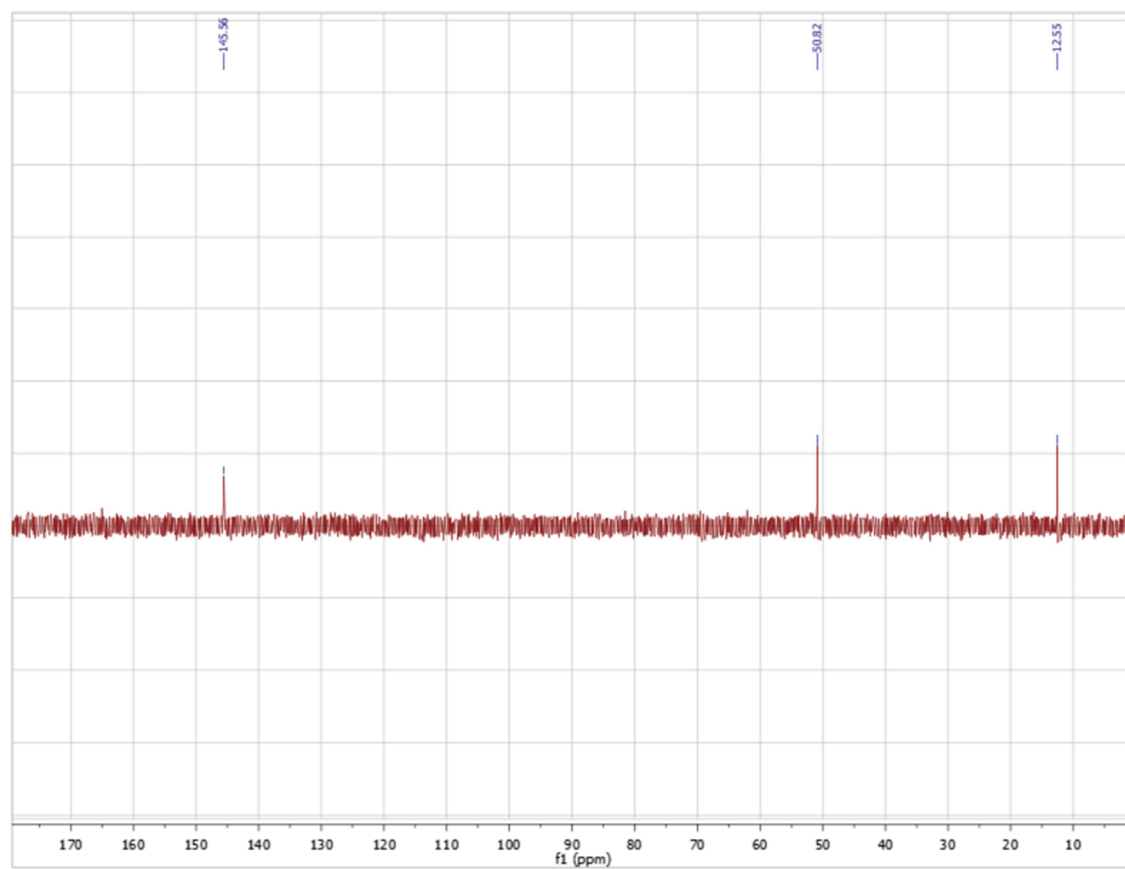

Figure S5.  $^{13}\text{C}$  NMR 4b.

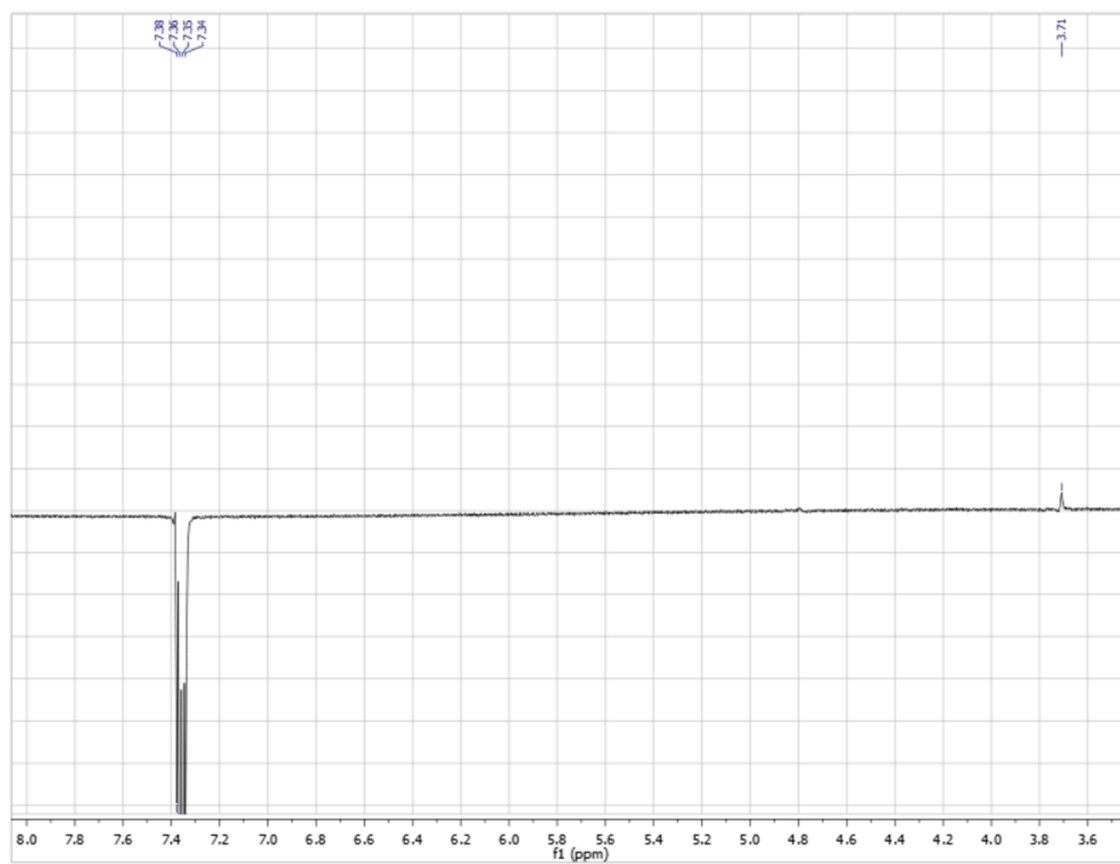

Figure S6. 1D NOESY 4b.

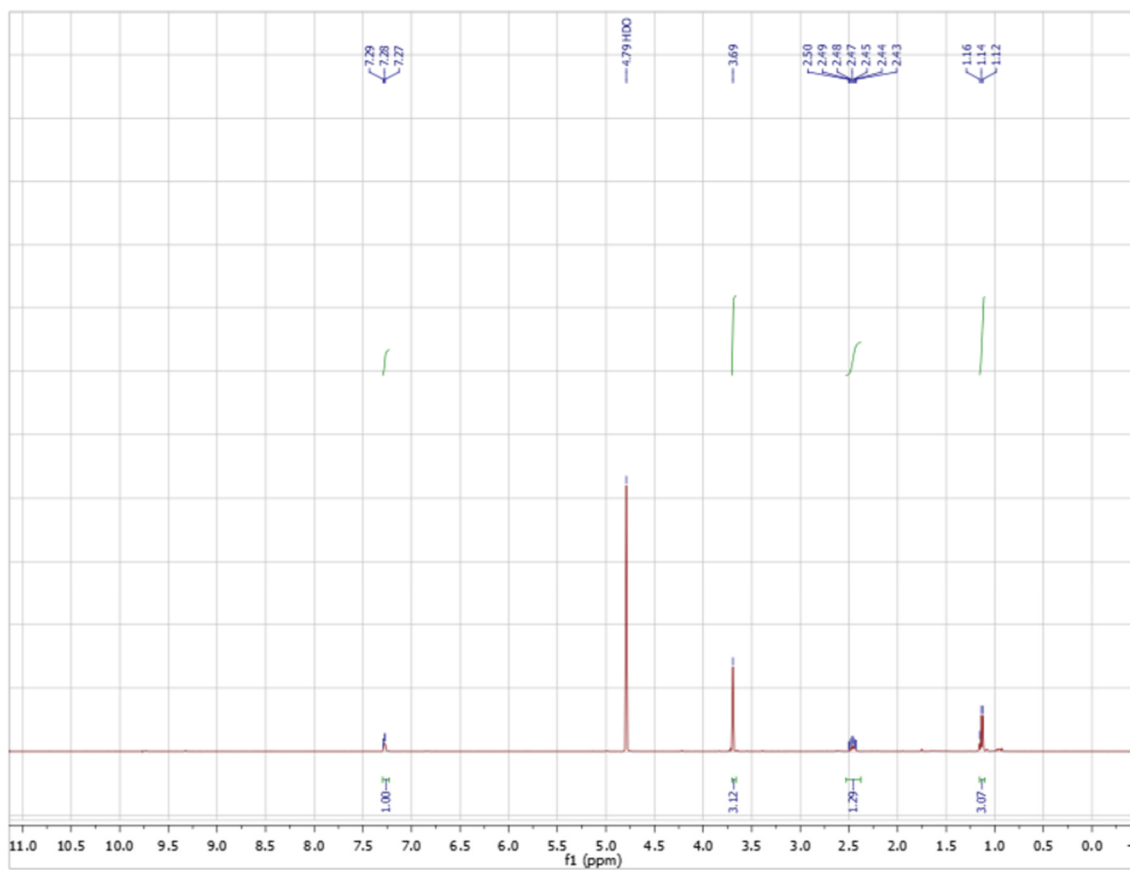

Figure S7. <sup>1</sup>H NMR 4c.

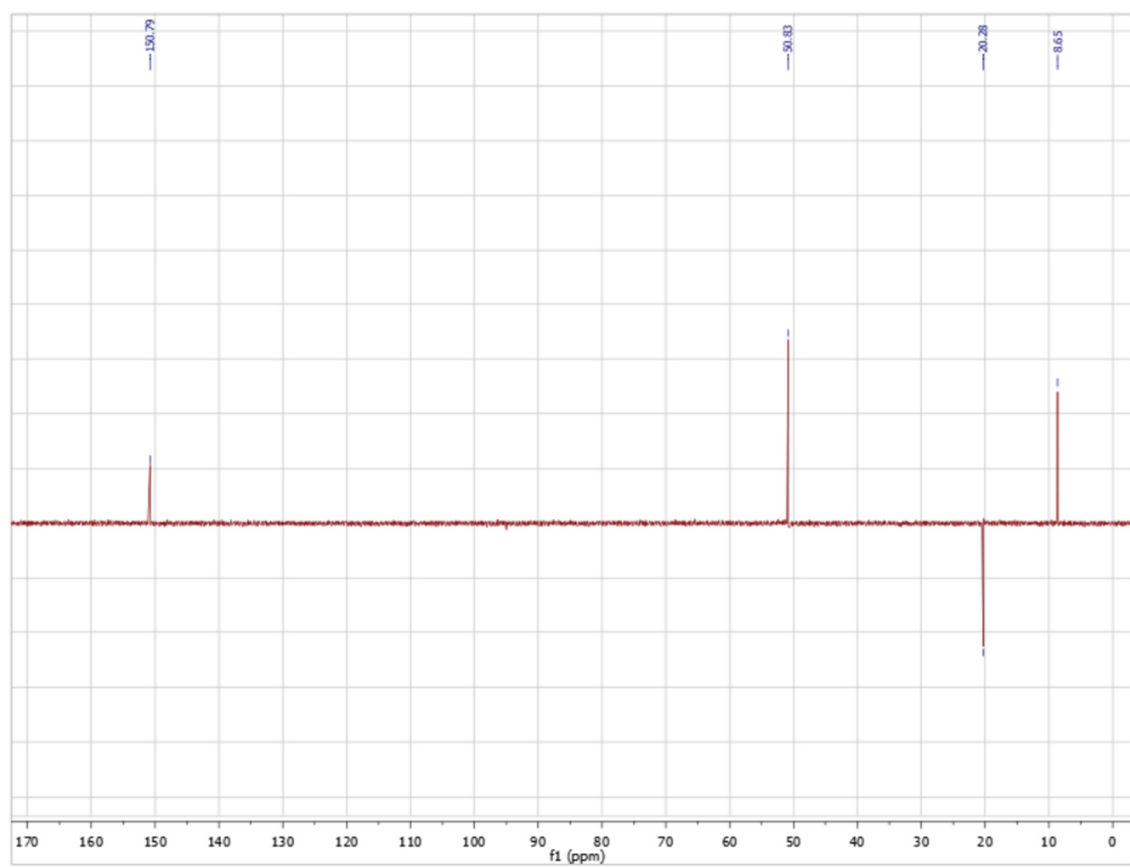

Figure S8. <sup>13</sup>C NMR 4c.

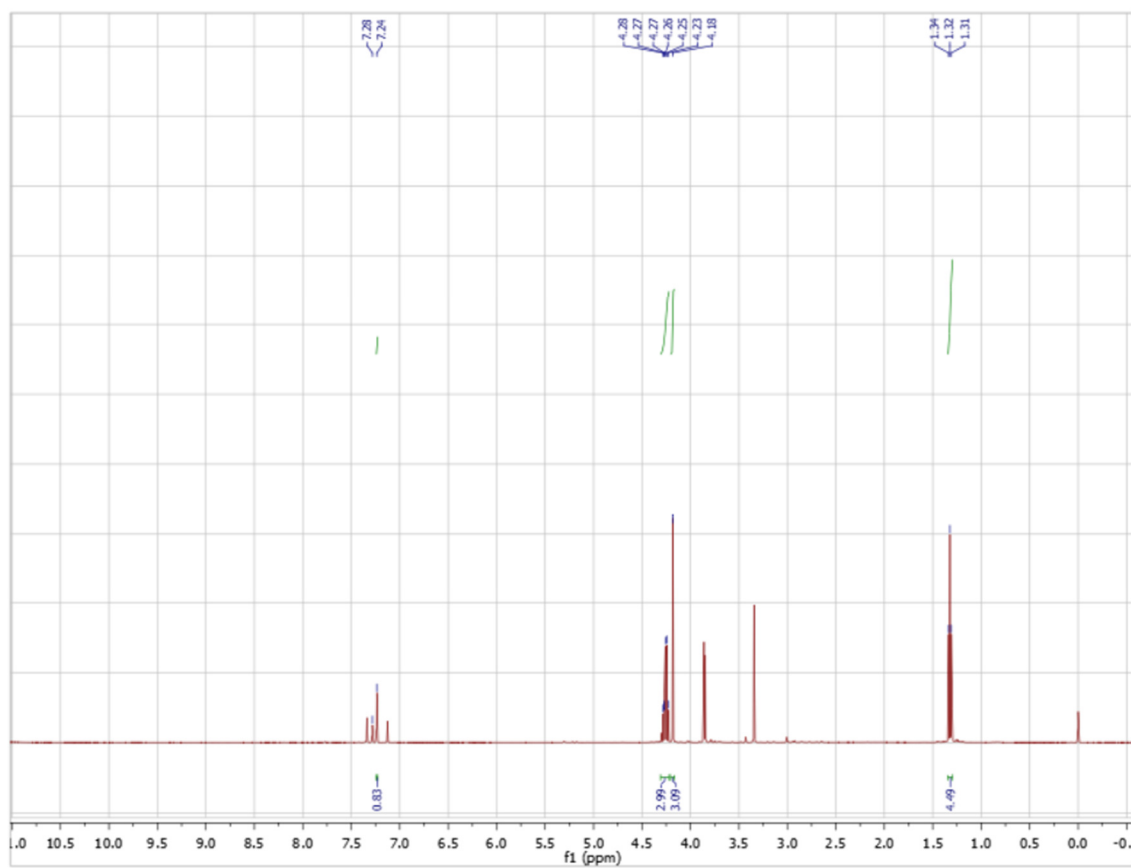

Figure S9. <sup>1</sup>H NMR 4d.

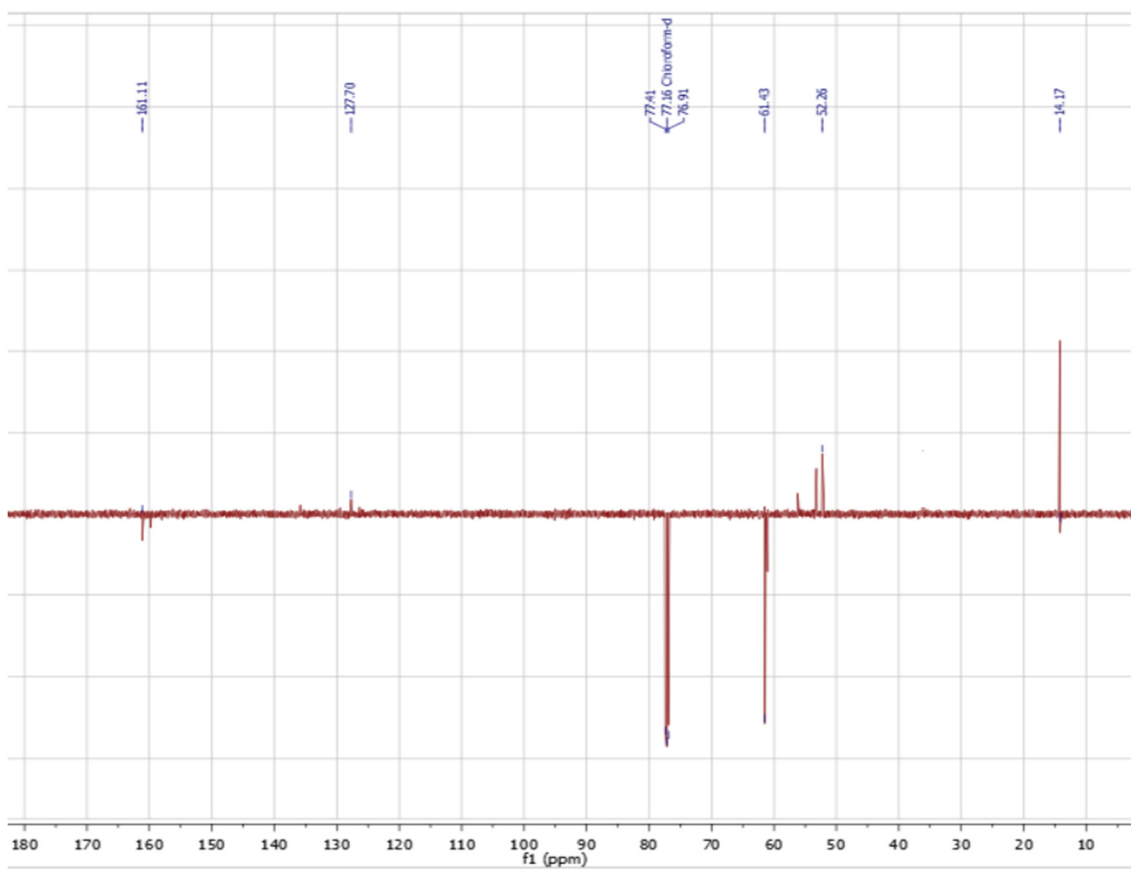

Figure S10. <sup>13</sup>C NMR 4d.



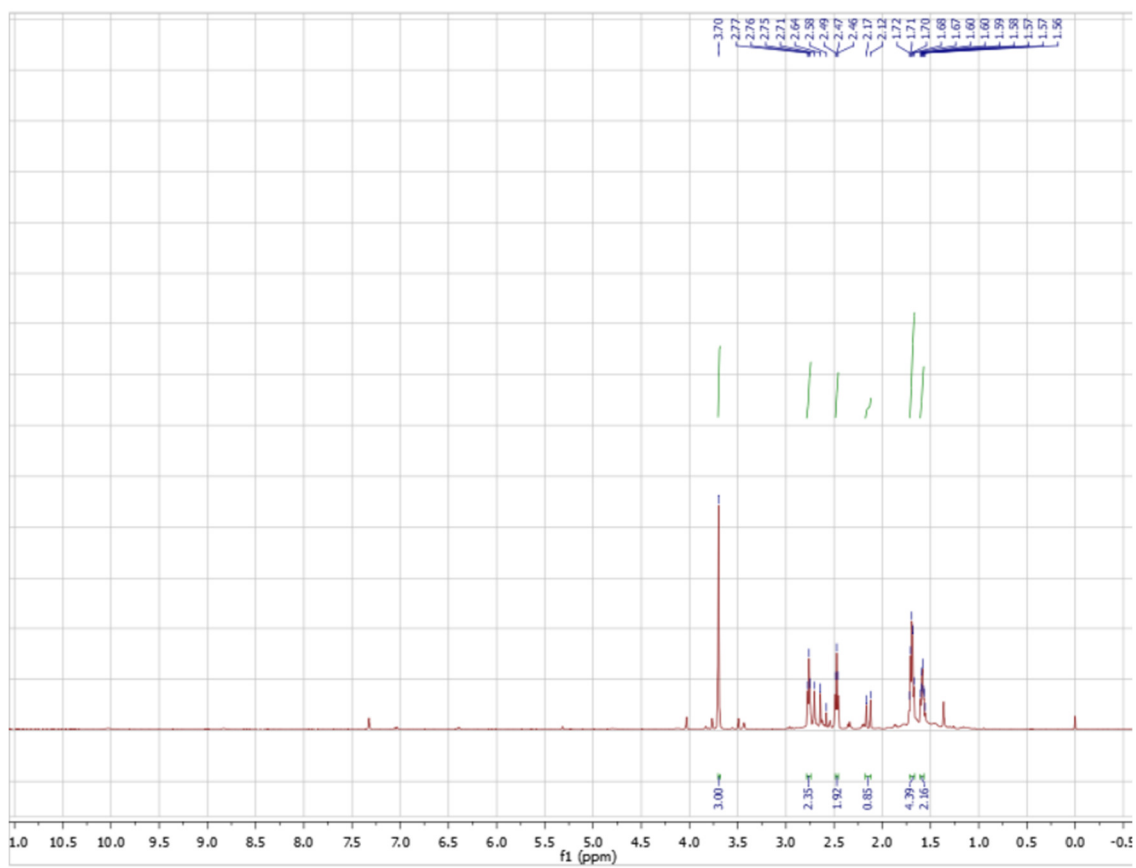

Figure S11. <sup>1</sup>H NMR 4e.

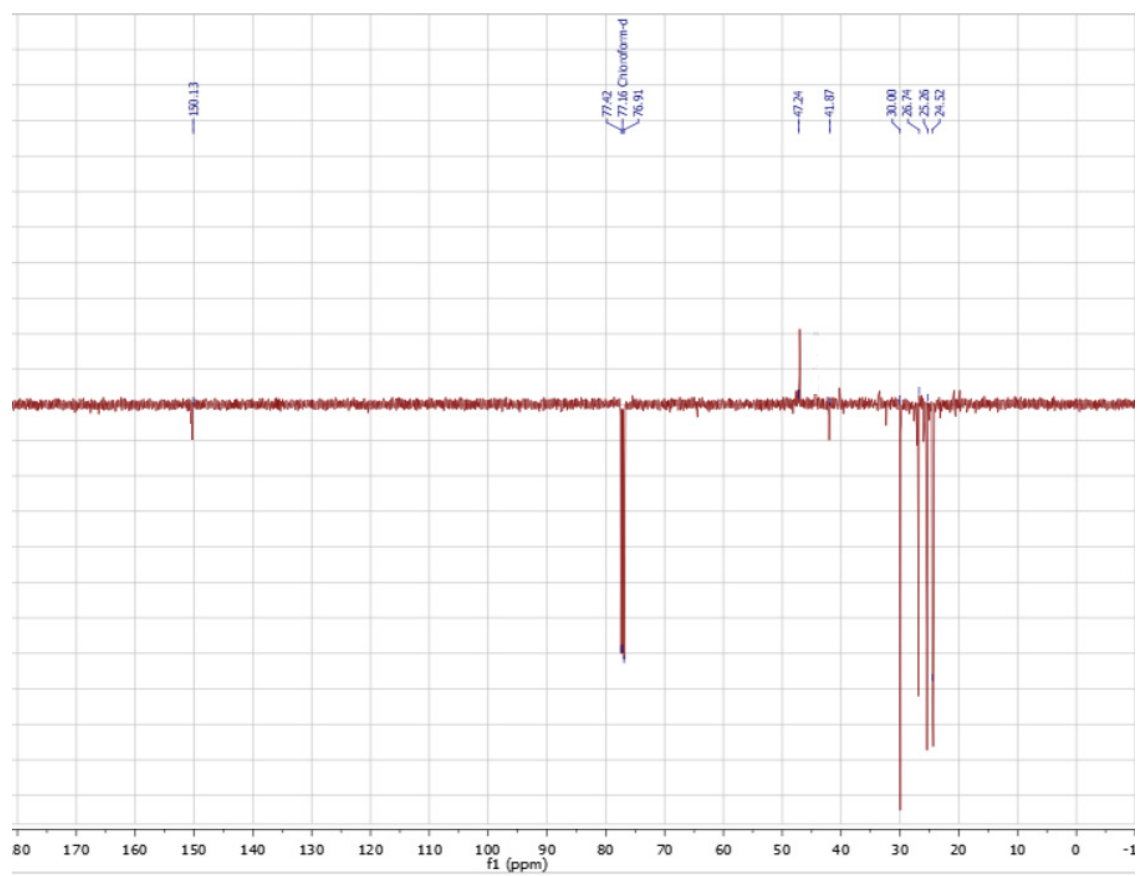

Figure S12. <sup>13</sup>C NMR 4e.

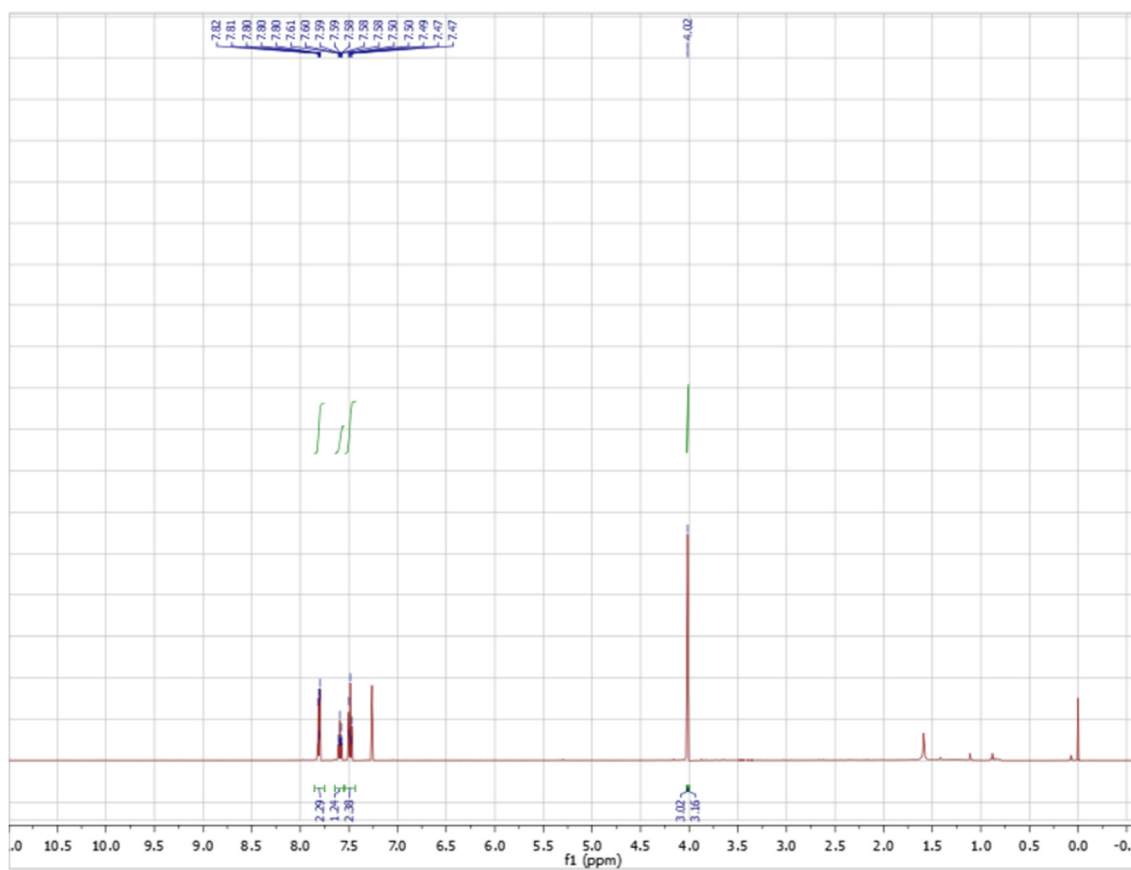

Figure S13. <sup>1</sup>H NMR 4f.

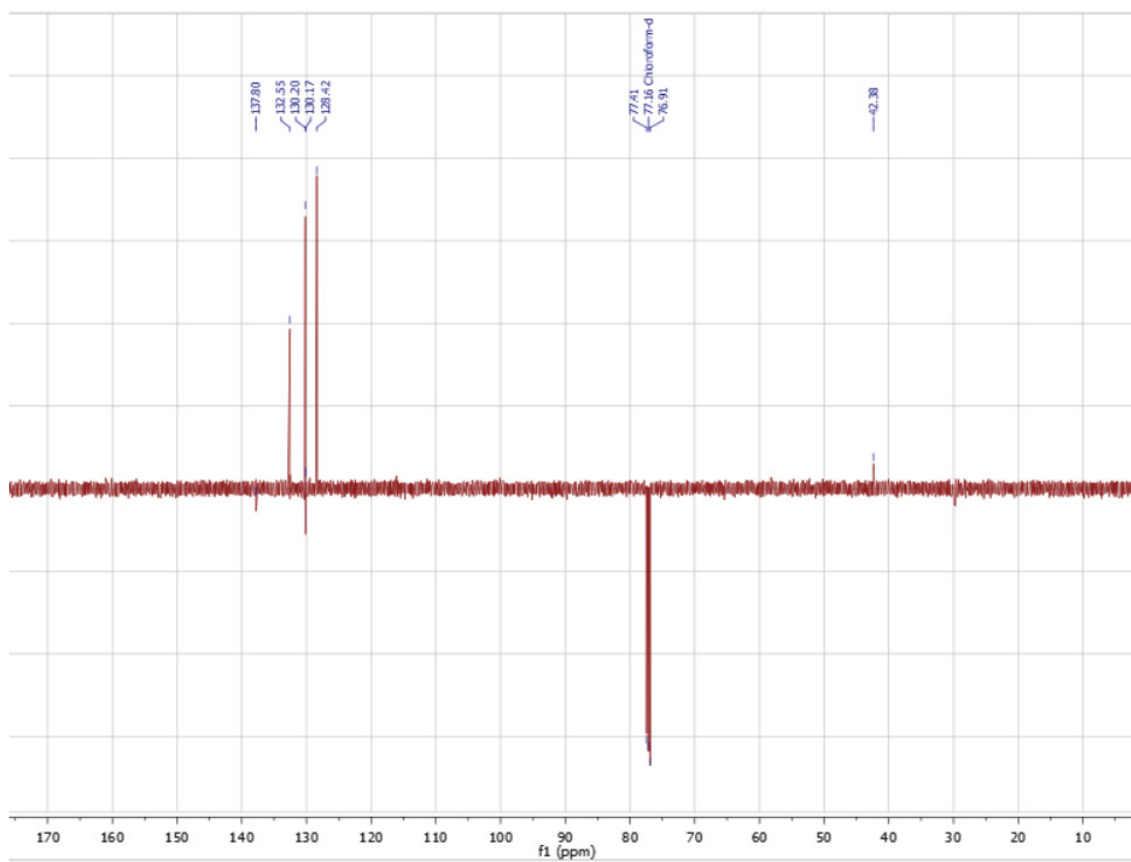

Figure S14. <sup>13</sup>C NMR 4f.

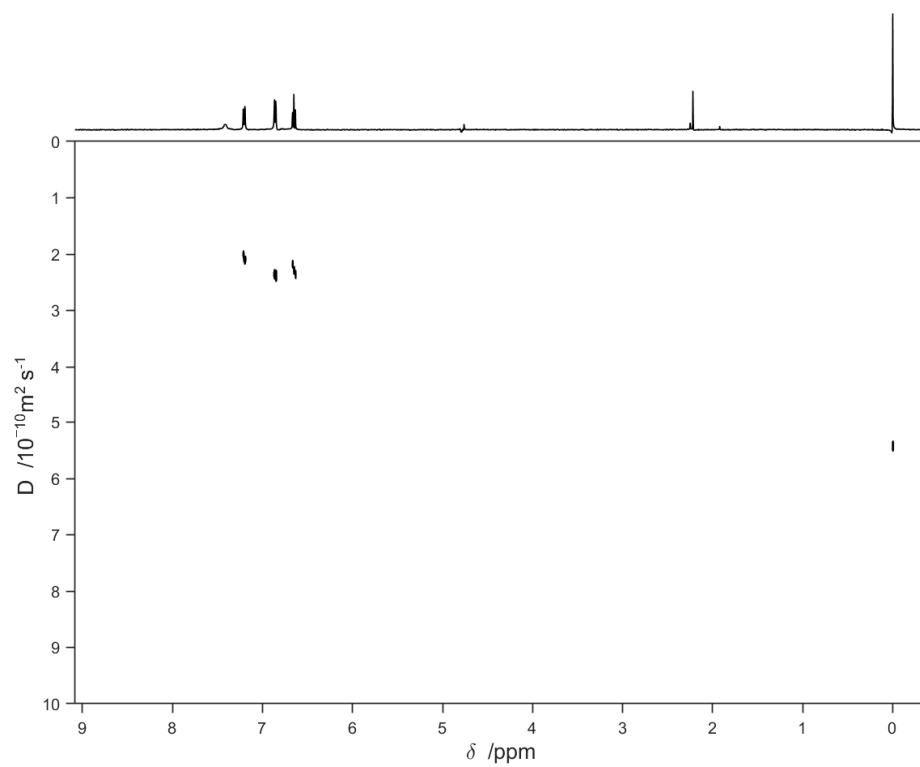

**Figure S15.** DOSY spectrum of **1**.

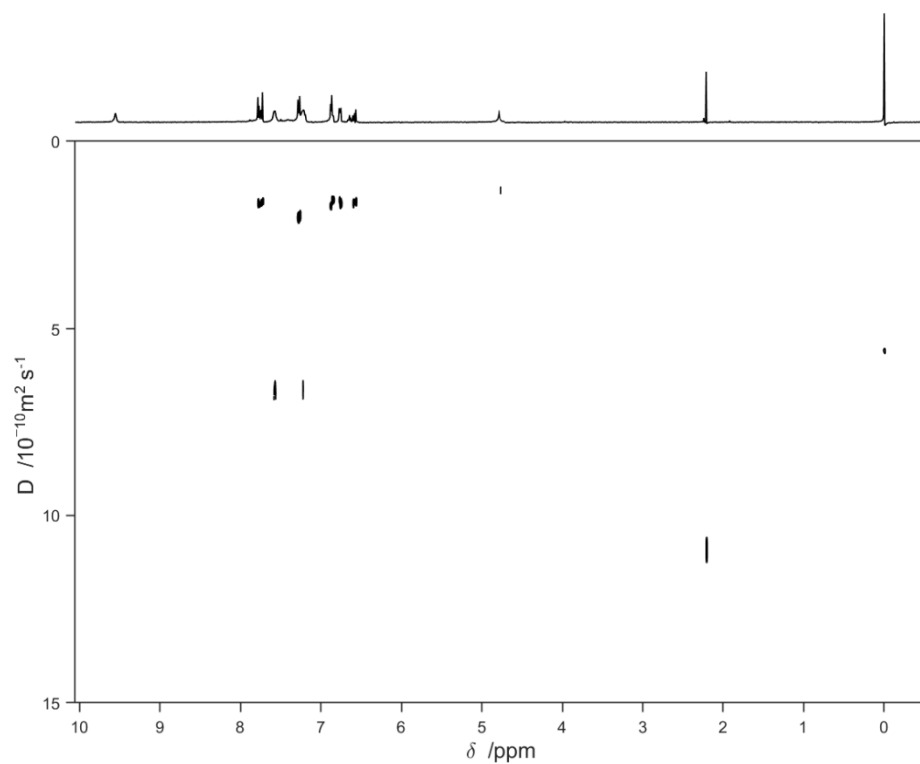

**Figure S16.** DOSY spectrum of **2a**.

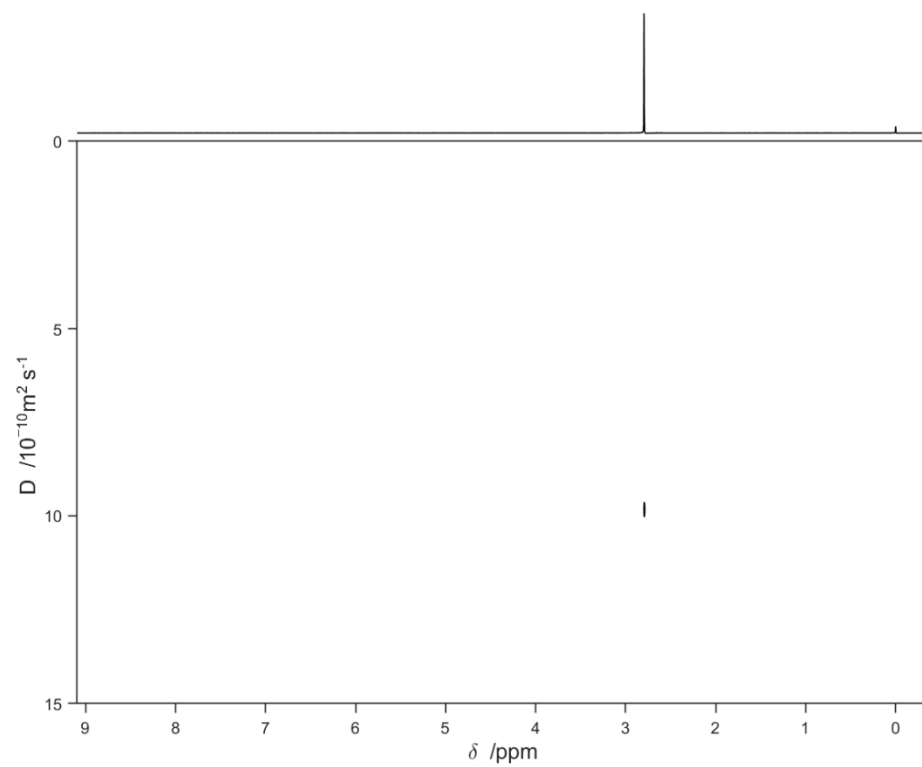

**Figure S17.** DOSY spectrum of **3**.

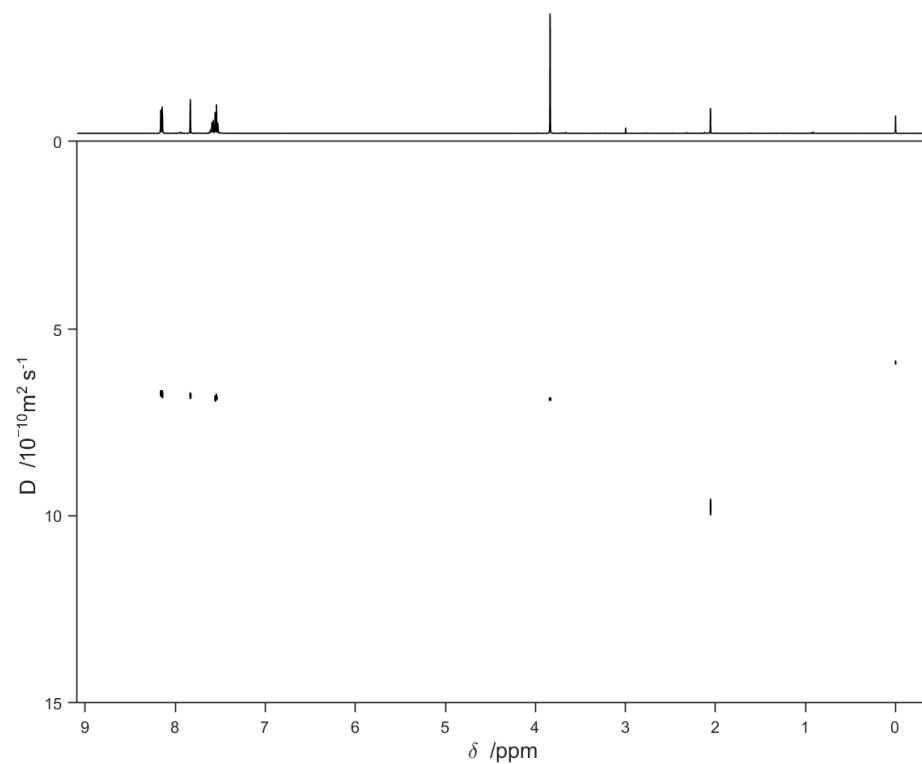

**Figure S18.** DOSY spectrum of **4a**.

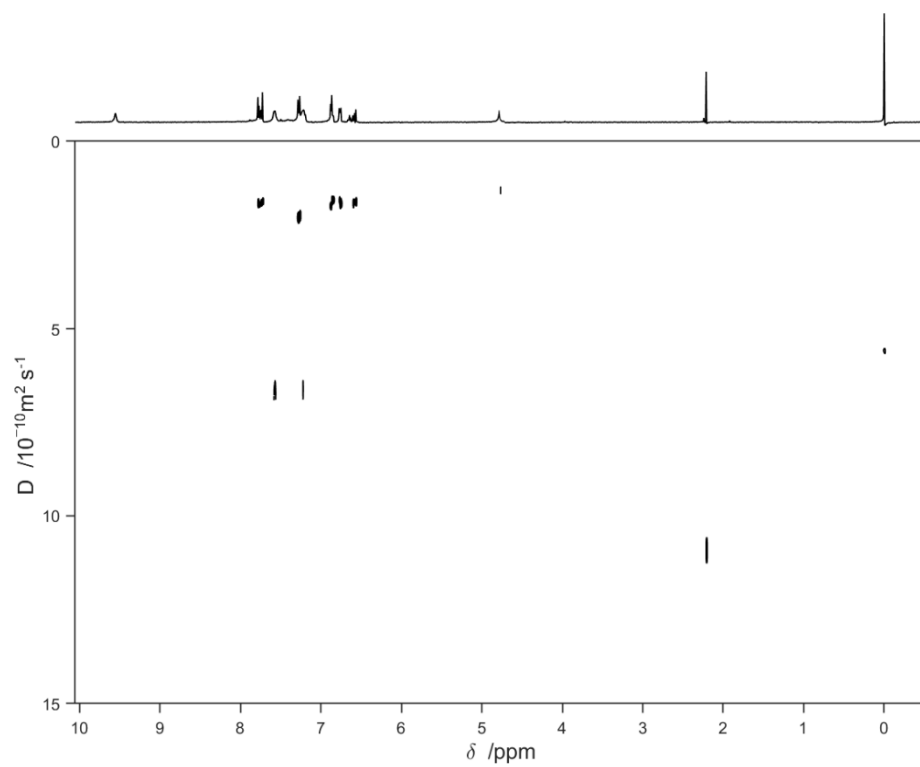

**Figure S19.** DOSY spectrum of **2a@1**.

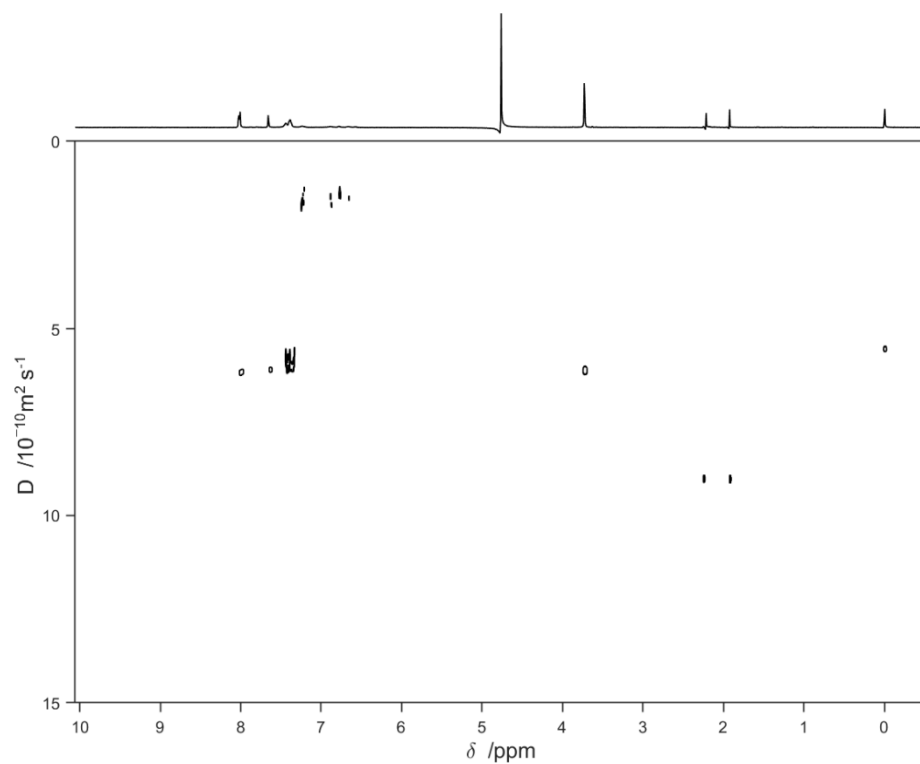

**Figure S20.** DOSY spectrum of **4a@1**.

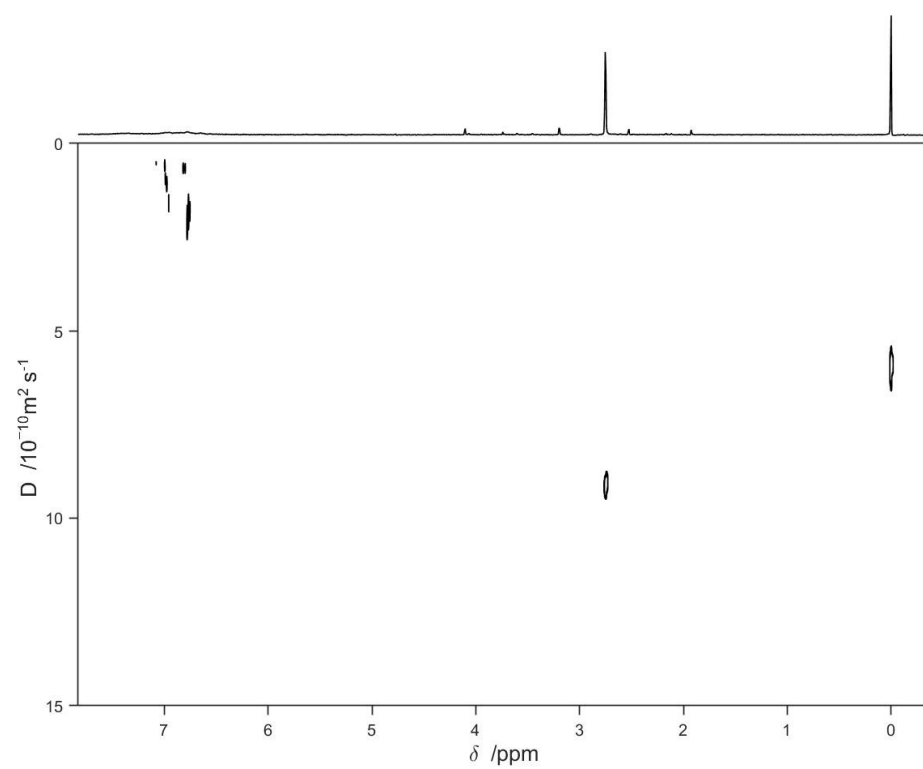

**Figure S21.** DOSY spectrum of 3@1.
